# Supplementary material for: Predicting the microalgae lipid profile obtained by supercritical fluid extraction using a machine learning model
Source: PubMed Central journal article supplement (PMC11543471; doi:10.3389/fchem.2024.1480887), 2024-10-25
Supplement: DataSheet3.pdf [file DataSheet3.pdf]

### Supplementary Data 3

Lipids identified during supercritical fluid extraction. Lipids were identified by metabolic fingerprinting using GL-RP-LC-ESI (+/-)-QTOF-MS

| Compound                                                                                                            | Formula                                           | Mass     | RT (min) | Mass Error (ppm) | Adduct                                       | Analytical platform | Detection Mode | ID level | Relative Abundance (%) |      |      |      |      |      |      |      |      |      |      |      |  |  |  |  |  |
|---------------------------------------------------------------------------------------------------------------------|---------------------------------------------------|----------|----------|------------------|----------------------------------------------|---------------------|----------------|----------|------------------------|------|------|------|------|------|------|------|------|------|------|------|--|--|--|--|--|
|                                                                                                                     |                                                   |          |          |                  |                                              |                     |                |          | SC1                    | SC2  | SC3  | SC4  | SC5  | SC6  | SC7  | SC8  | SC9  | SC10 | SC11 | SC12 |  |  |  |  |  |
| <b>Carbohydrates and carbohydrate conjugates</b>                                                                    |                                                   |          |          |                  |                                              |                     |                |          |                        |      |      |      |      |      |      |      |      |      |      |      |  |  |  |  |  |
| Armillarin                                                                                                          | C <sub>24</sub> H <sub>36</sub> O <sub>6</sub>    | 414.2042 | 1.34     | 4                | [M+H] <sup>+</sup>                           | GL-RP-LC-QTOF-MS    | ESI +          | 3        | 1.38                   | 1.00 | 1.16 | 1.03 | 0.80 | 0.71 | 1.02 | 1.00 | 0.81 | 0.95 | 0.77 | 0.80 |  |  |  |  |  |
| <b>Fatty Acyls</b>                                                                                                  |                                                   |          |          |                  |                                              |                     |                |          |                        |      |      |      |      |      |      |      |      |      |      |      |  |  |  |  |  |
| aminopentanoic acid                                                                                                 | C <sub>5</sub> H <sub>11</sub> NO <sub>2</sub>    | 117.079  | 0.67     | 4                | [M+Na] <sup>+</sup>                          | GL-RP-LC-QTOF-MS    | ESI +          | 3        | 0.57                   | 0.22 | 0.26 | 0.16 | 0.20 | 0.19 | 0.20 | 0.18 | 0.17 | 0.18 | 0.17 | 0.19 |  |  |  |  |  |
| FAL 16:0                                                                                                            | C <sub>16</sub> H <sub>32</sub> O                 | 240.2453 | 2.3      | 5                | [M+NH <sub>4</sub> ] <sup>+</sup>            | GL-RP-LC-QTOF-MS    | ESI +          | 3        | 0.17                   | 0.17 | 0.09 | 0.35 | 0.18 | 0.11 | 0.10 | 1.00 | 0.05 | 0.26 | 1.98 | 0.56 |  |  |  |  |  |
| FA 22:5;O                                                                                                           | C <sub>22</sub> H <sub>34</sub> O <sub>3</sub>    | 346.2508 | 4.91     | 0                | [M-H] <sup>-</sup>                           | GL-RP-LC-QTOF-MS    | ESI -          | 3        | 2.88                   | 0.89 | 2.03 | 0.72 | 1.89 | 1.30 | 1.35 | 0.74 | 1.41 | 0.68 | 0.60 | 1.67 |  |  |  |  |  |
| FA 22:6;O                                                                                                           | C <sub>22</sub> H <sub>32</sub> O <sub>3</sub>    | 344.2351 | 4.41     | 0                | [M-H] <sup>-</sup>                           | GL-RP-LC-QTOF-MS    | ESI -          | 3        | 1.91                   | 0.42 | 1.16 | 0.31 | 1.24 | 0.71 | 0.80 | 0.39 | 0.80 | 0.36 | 0.31 | 1.04 |  |  |  |  |  |
| FA 22:4;O                                                                                                           | C <sub>22</sub> H <sub>36</sub> O <sub>3</sub>    | 348.2664 | 5.62     | 0                | [M-H] <sup>-</sup>                           | GL-RP-LC-QTOF-MS    | ESI -          | 2        | 0.54                   | 0.11 | 0.28 | 0.08 | 0.27 | 0.16 | 0.14 | 0.13 | 0.13 | 0.06 | 0.06 | 0.18 |  |  |  |  |  |
| FA 26:1;O2                                                                                                          | C <sub>26</sub> H <sub>50</sub> O <sub>4</sub>    | 426.3709 | 7.08     | 4                | [M+H] <sup>+</sup>                           | GL-RP-LC-QTOF-MS    | ESI +          | 3        | 0.35                   | 0.27 | 0.31 | 0.42 | 1.08 | 0.19 | 0.10 | 0.07 | 0.14 | 0.11 | 0.65 | 0.09 |  |  |  |  |  |
| FOH 5:1                                                                                                             | C <sub>5</sub> H <sub>10</sub> O                  | 86.0732  | 0.67     | 8                | [M+NH <sub>4</sub> ] <sup>+</sup>            | GL-RP-LC-QTOF-MS    | ESI +          | 3        | 0.11                   | 0.38 | 0.49 | 0.17 | 0.03 | 0.50 | 0.10 | 0.14 | 0.04 | 0.28 | 0.05 | 0.59 |  |  |  |  |  |
| Stearamide                                                                                                          | C <sub>18</sub> H <sub>37</sub> NO                | 283.2875 | 5.11     | 5                | [M+H] <sup>+</sup>                           | GL-RP-LC-QTOF-MS    | ESI +          | 3        | 0.41                   | 0.00 | 0.00 | 0.00 | 0.00 | 0.00 | 0.00 | 0.00 | 0.00 | 0.00 | 0.00 | 0.00 |  |  |  |  |  |
| NA 23:4                                                                                                             | C <sub>23</sub> H <sub>39</sub> NO                | 345.3032 | 5.19     | 5                | [M+H] <sup>+</sup>                           | GL-RP-LC-QTOF-MS    | ESI +          | 3        | 0.06                   | 0.00 | 0.00 | 0.00 | 0.00 | 0.00 | 0.00 | 0.00 | 0.00 | 0.00 | 0.00 | 0.00 |  |  |  |  |  |
| NA 25:4                                                                                                             | C <sub>25</sub> H <sub>43</sub> NO                | 373.3345 | 6.09     | 4                | [M+H] <sup>+</sup>                           | GL-RP-LC-QTOF-MS    | ESI +          | 3        | 0.05                   | 0.00 | 0.00 | 0.00 | 0.00 | 0.00 | 0.00 | 0.00 | 0.00 | 0.00 | 0.00 | 0.00 |  |  |  |  |  |
| 6E-Heneicosen-11-one                                                                                                | C <sub>21</sub> H <sub>40</sub> O                 | 308.3079 | 5.61     | 6                | [M+NH <sub>4</sub> ] <sup>+</sup>            | GL-RP-LC-QTOF-MS    | ESI +          | 3        | 0.03                   | 0.00 | 0.00 | 0.00 | 0.00 | 0.00 | 0.00 | 0.00 | 0.00 | 0.00 | 0.00 | 0.00 |  |  |  |  |  |
| 12-Nonadecen-9-one                                                                                                  | C <sub>19</sub> H <sub>36</sub> O                 | 280.2766 | 5.36     | 5                | [M+NH <sub>4</sub> ] <sup>+</sup>            | GL-RP-LC-QTOF-MS    | ESI +          | 3        | 0.02                   | 0.00 | 0.00 | 0.00 | 0.00 | 0.00 | 0.00 | 0.00 | 0.00 | 0.00 | 0.00 | 0.00 |  |  |  |  |  |
| WE 24:2;O4                                                                                                          | C <sub>24</sub> H <sub>44</sub> O <sub>6</sub>    | 428.3138 | 4.38     | 0                | [M+Cl] <sup>-</sup>                          | GL-RP-LC-QTOF-MS    | ESI -          | 3        | 0.00                   | 0.00 | 0.00 | 0.00 | 0.00 | 0.00 | 0.00 | 0.00 | 0.00 | 0.00 | 0.18 | 0.00 |  |  |  |  |  |
| <b>Glycerolipids</b>                                                                                                |                                                   |          |          |                  |                                              |                     |                |          |                        |      |      |      |      |      |      |      |      |      |      |      |  |  |  |  |  |
| MGDG 16:0_18:1                                                                                                      | C <sub>43</sub> H <sub>80</sub> O <sub>10</sub>   | 756.5752 | 9.35     | 2                | [M+HCOOH-H]                                  | GL-RP-LC-QTOF-MS    | ESI -          | 2        | 0.99                   | 1.30 | 1.33 | 1.31 | 1.20 | 1.09 | 1.18 | 1.17 | 0.47 | 0.40 | 0.49 | 0.41 |  |  |  |  |  |
| MGDG 16:0_18:2                                                                                                      | C <sub>43</sub> H <sub>78</sub> O <sub>10</sub>   | 754.5595 | 8.71     | 2                | [M+NH <sub>4</sub> ] <sup>+</sup> /M+HCOOH-H | GL-RP-LC-QTOF-MS    | ESI +/-ESI     | 2        | 3.38                   | 4.23 | 3.91 | 3.98 | 4.45 | 3.69 | 3.64 | 4.06 | 3.15 | 2.66 | 3.03 | 2.62 |  |  |  |  |  |
| MGDG 18:2_18:2                                                                                                      | C <sub>43</sub> H <sub>78</sub> O <sub>10</sub>   | 778.5595 | 8.15     | 2                | M+HCOOH-H/M+Na                               | GL-RP-LC-QTOF-MS    | ESI -ESI +     | 2        | 1.35                   | 1.72 | 1.70 | 1.64 | 1.73 | 1.86 | 1.49 | 1.68 | 2.30 | 2.14 | 2.43 | 2.02 |  |  |  |  |  |
| MGDG 18:1_18:1                                                                                                      | C <sub>43</sub> H <sub>82</sub> O <sub>10</sub>   | 782.5908 | 9.45     | 1                | M+HCOOH-H/M+NH <sub>4</sub>                  | GL-RP-LC-QTOF-MS    | ESI -ESI +     | 2        | 0.46                   | 0.71 | 0.81 | 0.85 | 0.58 | 0.71 | 0.75 | 0.77 | 0.38 | 0.33 | 0.39 | 0.33 |  |  |  |  |  |
| MGDG 36:6                                                                                                           | C <sub>49</sub> H <sub>94</sub> O <sub>10</sub>   | 774.5282 | 7.84     | 6                | [M+HCOOH-H]                                  | GL-RP-LC-QTOF-MS    | ESI -          | 3        | 0.01                   | 0.03 | 0.00 | 0.10 | 0.07 | 0.07 | 0.54 | 0.49 | 0.06 | 0.05 | 0.08 | 0.07 |  |  |  |  |  |
| DG 34:1                                                                                                             | C <sub>37</sub> H <sub>70</sub> O <sub>5</sub>    | 594.5223 | 10.56    | 5                | [M+H] <sup>+</sup>                           | GL-RP-LC-QTOF-MS    | ESI +          | 3        | 0.66                   | 0.61 | 0.85 | 0.63 | 0.73 | 0.47 | 0.30 | 0.32 | 0.28 | 0.20 | 0.22 | 0.22 |  |  |  |  |  |
| DG 36:2                                                                                                             | C <sub>39</sub> H <sub>72</sub> O <sub>5</sub>    | 620.538  | 10.62    | 5                | [M+H] <sup>+</sup>                           | GL-RP-LC-QTOF-MS    | ESI +          | 3        | 1.01                   | 0.95 | 1.28 | 0.97 | 0.95 | 0.76 | 0.44 | 0.47 | 0.47 | 0.32 | 0.35 | 0.36 |  |  |  |  |  |
| DG O-40:8                                                                                                           | C <sub>43</sub> H <sub>70</sub> O <sub>4</sub>    | 650.5274 | 9.28     | 8                | [M-H] <sup>-</sup>                           | GL-RP-LC-QTOF-MS    | ESI -          | 3        | 0.47                   | 0.49 | 0.43 | 0.39 | 0.47 | 0.35 | 0.26 | 0.29 | 0.35 | 0.62 | 0.59 | 0.45 |  |  |  |  |  |
| DG 42:6                                                                                                             | C <sub>43</sub> H <sub>76</sub> O <sub>5</sub>    | 696.5693 | 10.11    | 6                | [M-H-H <sub>2</sub> O] <sup>-</sup>          | GL-RP-LC-QTOF-MS    | ESI -          | 3        | 0.78                   | 0.88 | 0.82 | 0.81 | 0.91 | 0.67 | 0.52 | 0.51 | 0.59 | 0.98 | 0.98 | 0.72 |  |  |  |  |  |
| SQDG 16:0_16:0                                                                                                      | C <sub>41</sub> H <sub>78</sub> O <sub>12</sub> S | 794.5214 | 7.75     | 1                | [M-H] <sup>-</sup>                           | GL-RP-LC-QTOF-MS    | ESI -          | 2        | 0.02                   | 0.04 | 0.01 | 0.14 | 0.09 | 0.12 | 0.72 | 0.61 | 0.26 | 0.16 | 0.29 | 0.28 |  |  |  |  |  |
| Glycerol 2-(9Z,12Z-octadecadienoate) 1-hexadecanoate 3-O-[alpha-D-galactopyranosyl-(1->6)-beta-D-galactopyranoside] | C <sub>60</sub> H <sub>88</sub> O <sub>15</sub>   | 916.6123 | 8.05     | 2                | M-H/M+NH <sub>4</sub>                        | GL-RP-LC-QTOF-MS    | ESI -ESI +     | 3        | 0.30                   | 0.81 | 0.33 | 1.07 | 1.23 | 1.03 | 2.72 | 2.53 | 0.95 | 0.71 | 0.88 | 0.80 |  |  |  |  |  |
| <b>Glycerophospholipids</b>                                                                                         |                                                   |          |          |                  |                                              |                     |                |          |                        |      |      |      |      |      |      |      |      |      |      |      |  |  |  |  |  |
| PG 34:1                                                                                                             | C <sub>40</sub> H <sub>77</sub> O <sub>10</sub> P | 748.5254 | 8.22     | 2                | [M-H] <sup>-</sup>                           | GL-RP-LC-QTOF-MS    | ESI -          | 3        | 0.05                   | 0.13 | 0.03 | 0.19 | 0.15 | 0.17 | 0.46 | 0.54 | 0.11 | 0.09 | 0.11 | 0.09 |  |  |  |  |  |
| PG O-36:1                                                                                                           | C <sub>42</sub> H <sub>83</sub> O <sub>9</sub> P  | 762.5775 | 7.98     | 4                | [M+Cl] <sup>-</sup>                          | GL-RP-LC-QTOF-MS    | ESI -          | 4        | 0.48                   | 0.61 | 0.58 | 0.57 | 0.65 | 0.42 | 0.51 | 0.59 | 0.24 | 0.14 | 0.16 | 0.13 |  |  |  |  |  |
| PG 40:1                                                                                                             | C <sub>46</sub> H <sub>89</sub> O <sub>10</sub> P | 832.6193 | 11.01    | 8                | [M+K] <sup>+</sup>                           | GL-RP-LC-QTOF-MS    | ESI +          | 3        | 7.26                   | 4.14 | 6.72 | 3.66 | 4.94 | 3.89 | 2.32 | 2.01 | 1.22 | 0.82 | 3.43 | 1.64 |  |  |  |  |  |
| PG O-38:3                                                                                                           | C <sub>44</sub> H <sub>83</sub> O <sub>9</sub> P  | 786.5775 | 7.57     | 4                | [M+Cl] <sup>-</sup>                          | GL-RP-LC-QTOF-MS    | ESI -          | 4        | 0.21                   | 0.32 | 0.32 | 0.33 | 0.29 | 0.63 | 0.30 | 0.32 | 1.01 | 0.98 | 1.11 | 0.93 |  |  |  |  |  |
| PG 40:6                                                                                                             | C <sub>46</sub> H <sub>79</sub> O <sub>10</sub> P | 822.5411 | 8.7      | 9                | [M+HCOOH-H]                                  | GL-RP-LC-QTOF-MS    | ESI -          | 4        | 0.77                   | 0.89 | 0.90 | 0.82 | 0.95 | 0.69 | 0.82 | 0.89 | 0.59 | 0.46 | 0.52 | 0.47 |  |  |  |  |  |
| LPC O-14:0                                                                                                          | C <sub>22</sub> H <sub>48</sub> NO <sub>3</sub> P | 453.3219 | 6.04     | 6                | M+Na                                         | GL-RP-LC-QTOF-MS    | ESI +          | 4        | 0.03                   | 0.00 | 0.00 | 0.00 | 0.00 | 0.00 | 0.00 | 0.00 | 0.00 | 0.00 | 0.00 | 0.00 |  |  |  |  |  |
| PC O-34:5                                                                                                           | C <sub>42</sub> H <sub>76</sub> NO <sub>7</sub> P | 737.5359 | 8.85     | 1                | [M+NH <sub>4</sub> ] <sup>+</sup>            | GL-RP-LC-QTOF-MS    | ESI +          | 3        | 1.37                   | 1.59 | 1.51 | 1.60 | 1.86 | 1.40 | 1.55 | 1.46 | 0.82 | 0.73 | 0.79 | 0.83 |  |  |  |  |  |
| PC 36:1                                                                                                             | C <sub>46</sub> H <sub>86</sub> NO <sub>8</sub> P | 787.6091 | 9.83     | 5                | [M+HCOOH-H]/[M+H] <sup>+</sup>               | GL-RP-LC-QTOF-MS    | ESI -ESI +     | 3        | 0.75                   | 1.30 | 0.79 | 1.76 | 1.31 | 1.71 | 1.90 | 1.68 | 1.22 | 1.46 | 1.51 | 1.60 |  |  |  |  |  |
| PC O-38:9                                                                                                           | C <sub>46</sub> H <sub>78</sub> NO <sub>7</sub> P | 785.5359 | 8.91     | 2                | [M+NH <sub>4</sub> ] <sup>+</sup>            | GL-RP-LC-QTOF-MS    | ESI +          | 3        | 0.43                   | 0.42 | 0.59 | 0.39 | 0.39 | 0.22 | 0.28 | 0.26 | 0.15 | 0.11 | 0.10 | 0.13 |  |  |  |  |  |
| PC 16:1_16:0                                                                                                        | C <sub>40</sub> H <sub>78</sub> NO <sub>8</sub> P | 731.5465 | 8.15     | 5                | [M+HCOOH-H]/[M+H] <sup>+</sup>               | GL-RP-LC-QTOF-MS    | ESI -ESI +     | 2        | 0.63                   | 1.00 | 0.58 | 1.12 | 1.18 | 1.65 | 1.74 | 1.73 | 1.46 | 1.60 | 1.65 | 1.70 |  |  |  |  |  |
| PC 16:0_18:1                                                                                                        | C <sub>42</sub> H <sub>82</sub> NO <sub>8</sub> P | 759.5778 | 8.8      | 2                | [M+HCOOH-H]                                  | GL-RP-LC-QTOF-MS    | ESI -          | 2        | 3.30                   | 4.69 | 3.48 | 4.75 | 4.05 | 5.00 | 4.95 | 5.52 | 6.38 | 6.82 | 6.08 |      |  |  |  |  |  |
| PC 18:1_18:1                                                                                                        | C <sub>44</sub> H <sub>86</sub> NO <sub>8</sub> P | 785.5935 | 9.06     | 5                | M+HCOOH-H/M+H                                | GL-RP-LC-QTOF-MS    | ESI -ESI +     | 2        | 6.05                   | 7.97 | 6.54 | 8.54 | 7.24 | 7.98 | 9.45 | 9.45 | 7.79 | 7.97 | 7.78 | 9.01 |  |  |  |  |  |
| PC 18:2_16:0                                                                                                        | C <sub>42</sub> H <sub>80</sub> NO <sub>8</sub> P | 757.5622 | 8.32     | 3                | M+H/M+HCOOH-H                                | GL-RP-LC-QTOF-MS    | ESI -ESI +     | 2        | 3.86                   | 5.35 | 2.96 | 5.05 | 5.62 | 7.18 | 6.19 | 6.16 | 7.78 | 8.12 | 8.15 | 9.09 |  |  |  |  |  |
| PC 18:2_18:2                                                                                                        | C <sub>44</sub> H <sub>86</sub> NO <sub>8</sub> P | 781.5622 | 8.97     | 2                | [M+HCOOH-H]/[M+H] <sup>+</sup>               | GL-RP-LC-QTOF-MS    | ESI -ESI +     | 2        | 1.15                   | 1.39 | 1.18 | 1.45 | 1.32 | 1.52 | 1.50 | 1.40 | 1.42 | 1.37 | 1.65 |      |  |  |  |  |  |
| LPE O-24:0;O                                                                                                        | C <sub>26</sub> H <sub>42</sub> NO <sub>3</sub> P | 567.4264 | 6.13     | 4                | [M+H] <sup>+</sup>                           | GL-RP-LC-QTOF-MS    | ESI +          | 3        | 1.29                   | 1.87 | 1.68 | 1.71 | 1.65 | 1.53 | 1.91 | 1.62 | 1.04 | 0.95 | 0.80 | 0.87 |  |  |  |  |  |
| PE 36:1                                                                                                             | C <sub>41</sub> H <sub>80</sub> NO <sub>8</sub> P | 745.5622 | 8.55     | 8                | [M+H] <sup>+</sup>                           | GL-RP-LC-QTOF-MS    | ESI +          | 3        | 0.70                   | 1.24 | 0.94 | 1.74 | 1.12 | 2.57 | 2.03 | 2.02 | 2.83 | 3.21 | 3.23 | 3.50 |  |  |  |  |  |

continued on next page

Supplementary Data 3. (Continued)

| Compound                                              | Formula                                                          | Mass     | RT (min) | Mass Error (ppm) | Adduct                                       | Analytical platform | Detection Mode | ID level | Relative Abundance (%) |      |      |       |      |      |      |       |      |      |      |      |
|-------------------------------------------------------|------------------------------------------------------------------|----------|----------|------------------|----------------------------------------------|---------------------|----------------|----------|------------------------|------|------|-------|------|------|------|-------|------|------|------|------|
|                                                       |                                                                  |          |          |                  |                                              |                     |                |          | SC1                    | SC2  | SC3  | SC4   | SC5  | SC6  | SC7  | SC8   | SC9  | SC10 | SC11 | SC12 |
| PE 37:3                                               | C <sub>42</sub> H <sub>78</sub> NO <sub>8</sub> P                | 755.5465 | 7.72     | 4                | [M+H] <sup>+</sup>                           | GL-RP-LC-QTOF-MS    | ESI +          |          | 0.07                   | 0.10 | 0.06 | 0.13  | 0.05 | 0.35 | 0.07 | 0.06  | 0.71 | 0.91 | 0.94 | 0.90 |
| PE 38:2                                               | C <sub>43</sub> H <sub>82</sub> NO <sub>8</sub> P                | 771.5778 | 8.65     | 5                | [M+H] <sup>+</sup>                           | GL-RP-LC-QTOF-MS    | ESI +          | 3        | 0.11                   | 0.28 | 0.19 | 0.22  | 0.26 | 0.50 | 0.49 | 0.48  | 0.44 | 0.54 | 0.59 | 0.57 |
| PE 39:3                                               | C <sub>44</sub> H <sub>86</sub> NO <sub>8</sub> P                | 783.5778 | 8.39     | 5                | [M+H] <sup>+</sup>                           | GL-RP-LC-QTOF-MS    | ESI +          | 3        | 1.79                   | 2.89 | 1.49 | 2.73  | 2.87 | 4.51 | 3.43 | 3.49  | 5.17 | 5.54 | 5.47 | 6.16 |
| PE 18:1_18:1                                          | C <sub>41</sub> H <sub>78</sub> NO <sub>8</sub> P                | 743.5465 | 9.05     | 2                | [M-H] <sup>-</sup>                           | GL-RP-LC-QTOF-MS    | ESI -          | 2        | 0.57                   | 0.89 | 0.37 | 1.27  | 1.23 | 1.51 | 2.25 | 2.80  | 2.78 | 2.70 | 2.97 | 2.63 |
| PE 18:2_18:1                                          | C <sub>41</sub> H <sub>78</sub> NO <sub>8</sub> P                | 741.5309 | 8.41     | 1                | [M-H] <sup>-</sup>                           | GL-RP-LC-QTOF-MS    | ESI -          | 2        | 0.07                   | 0.10 | 0.04 | 0.11  | 0.13 | 0.21 | 0.20 | 0.26  | 0.58 | 0.58 | 0.63 | 0.55 |
| PA O-36:0                                             | C <sub>30</sub> H <sub>50</sub> O <sub>7</sub> P                 | 690.5563 | 11.7     | 9                | [M+NH <sub>4</sub> ] <sup>+</sup>            | GL-RP-LC-QTOF-MS    | ESI +          | 3        | 0.48                   | 0.37 | 0.38 | 0.22  | 0.46 | 0.26 | 0.09 | 0.19  | 0.84 | 0.87 | 0.51 | 1.01 |
| PE dO-40:0                                            | C <sub>45</sub> H <sub>84</sub> NO <sub>7</sub> P                | 791.6768 | 11.7     | 9                | [M+H] <sup>+</sup>                           | GL-RP-LC-QTOF-MS    | ESI +          | 3        | 0.46                   | 0.36 | 0.37 | 0.23  | 0.43 | 0.24 | 0.10 | 0.20  | 0.75 | 0.74 | 0.48 | 0.86 |
| PI O-38:1                                             | C <sub>41</sub> H <sub>81</sub> O <sub>12</sub> P                | 878.6248 | 7.47     | 4                | [M+Cl] <sup>-</sup>                          | GL-RP-LC-QTOF-MS    | ESI -          | 3        | 0.05                   | 0.14 | 0.07 | 0.23  | 0.20 | 0.24 | 0.59 | 0.56  | 0.28 | 0.22 | 0.27 | 0.25 |
| PI 38:4                                               | C <sub>47</sub> H <sub>83</sub> O <sub>13</sub> P                | 886.5571 | 10.62    | 7                | [M+H] <sup>+</sup>                           | GL-RP-LC-QTOF-MS    | ESI +          | 3        | 0.26                   | 0.24 | 0.59 | 0.09  | 0.13 | 0.13 | 0.06 | 0.04  | 0.05 | 0.04 | 0.12 | 0.07 |
| PI 44:8                                               | C <sub>53</sub> H <sub>87</sub> O <sub>13</sub> P                | 962.5884 | 9.56     | 3                | [M+Cl] <sup>-</sup>                          | GL-RP-LC-QTOF-MS    | ESI -          | 3        | 1.20                   | 3.30 | 1.53 | 0.33  | 0.31 | 0.12 | 0.13 | 0.14  | 0.13 | 0.06 | 0.06 | 0.06 |
| PIP 38:2                                              | C <sub>47</sub> H <sub>86</sub> O <sub>16</sub> P <sub>2</sub>   | 970.5548 | 9.36     | 2                | [M+Cl] <sup>-</sup>                          | GL-RP-LC-QTOF-MS    | ESI -          | 4        | 1.51                   | 1.83 | 1.93 | 2.13  | 1.95 | 1.73 | 1.81 | 2.16  | 1.77 | 1.37 | 1.36 | 1.31 |
| PIM1 32:1                                             | C <sub>47</sub> H <sub>87</sub> O <sub>18</sub> P                | 970.563  | 9.73     | 3                | [M+H-H <sub>2</sub> O] <sup>+</sup>          | GL-RP-LC-QTOF-MS    | ESI +          | 3        | 0.45                   | 1.00 | 0.51 | 0.12  | 0.12 | 0.05 | 0.06 | 0.05  | 0.04 | 0.02 | 0.02 | 0.02 |
| PS 39:2                                               | C <sub>48</sub> H <sub>84</sub> NO <sub>10</sub> P               | 829.5833 | 8.22     | 2                | [M-H] <sup>-</sup>                           | GL-RP-LC-QTOF-MS    | ESI -          | 3        | 0.51                   | 0.76 | 0.45 | 0.64  | 0.64 | 1.09 | 0.72 | 0.84  | 1.82 | 1.91 | 2.09 | 1.79 |
| PS 39:3                                               | C <sub>48</sub> H <sub>82</sub> NO <sub>10</sub> P               | 827.5676 | 8.78     | 1                | [M+HCOOH-H] <sup>-</sup>                     | GL-RP-LC-QTOF-MS    | ESI -          | 3        | 0.44                   | 0.59 | 0.51 | 0.57  | 0.52 | 0.54 | 0.57 | 0.64  | 0.77 | 0.74 | 0.78 | 0.73 |
| PS 36:0                                               | C <sub>42</sub> H <sub>82</sub> NO <sub>10</sub> P               | 791.5676 | 8.38     | 2                | [M-H] <sup>-</sup>                           | GL-RP-LC-QTOF-MS    | ESI -          | 3        | 0.25                   | 0.46 | 0.32 | 0.56  | 0.34 | 0.74 | 0.58 | 0.66  | 1.11 | 1.22 | 1.32 | 1.13 |
| PS 39:4                                               | C <sub>48</sub> H <sub>80</sub> NO <sub>10</sub> P               | 825.552  | 8.14     | 1                | [M+HCOOH-H] <sup>-</sup>                     | GL-RP-LC-QTOF-MS    | ESI -          | 3        | 0.17                   | 0.21 | 0.15 | 0.19  | 0.20 | 0.29 | 0.18 | 0.22  | 0.47 | 0.48 | 0.52 | 0.45 |
| PS(DiMe(11,3)/DiMe(13,5))                             | C <sub>50</sub> H <sub>84</sub> NO <sub>12</sub> P               | 921.5731 | 8.17     | 2                | [M+NH <sub>4</sub> ] <sup>+</sup>            | GL-RP-LC-QTOF-MS    | ESI +          | 3        | 0.04                   | 0.14 | 0.05 | 0.22  | 0.29 | 0.24 | 0.86 | 0.67  | 0.15 | 0.12 | 0.14 | 0.16 |
| <b>Polyketides</b>                                    |                                                                  |          |          |                  |                                              |                     |                |          |                        |      |      |       |      |      |      |       |      |      |      |      |
| Anacardic acid                                        | C <sub>22</sub> H <sub>30</sub> O <sub>3</sub>                   | 342.2195 | 4.02     | 0                | [M-H] <sup>-</sup>                           | GL-RP-LC-QTOF-MS    | ESI -          | 3        | 2.29                   | 0.65 | 1.55 | 0.50  | 1.65 | 1.06 | 1.13 | 0.69  | 1.16 | 0.67 | 0.47 | 1.52 |
| <b>Prenol lipids</b>                                  |                                                                  |          |          |                  |                                              |                     |                |          |                        |      |      |       |      |      |      |       |      |      |      |      |
| Lucidenic acid                                        | C <sub>27</sub> H <sub>38</sub> O <sub>7</sub>                   | 474.2618 | 4.44     | 2                | [M+NH <sub>4</sub> ] <sup>+</sup>            | GL-RP-LC-QTOF-MS    | ESI +          | 3        | 0.03                   | 0.00 | 0.00 | 0.00  | 0.00 | 0.00 | 0.00 | 0.00  | 0.00 | 0.00 | 0.00 | 0.00 |
| Hydroxyglabrolide                                     | C <sub>30</sub> H <sub>44</sub> O <sub>5</sub>                   | 484.3189 | 5.34     | 1                | [M+H] <sup>+</sup>                           | GL-RP-LC-QTOF-MS    | ESI +          | 3        | 0.02                   | 0.00 | 0.00 | 0.00  | 0.00 | 0.00 | 0.00 | 0.00  | 0.00 | 0.00 | 0.00 | 0.00 |
| Zeaxanthin diglucoside/ Zeaxanthin beta-D-diglucoside | C <sub>53</sub> H <sub>76</sub> O <sub>12</sub>                  | 892.5337 | 9.38     | 3                | [M+H] <sup>+</sup> /[M+HCOOH-H] <sup>+</sup> | GL-RP-LC-QTOF-MS    | ESI -/ESI +    | 3        | 7.55                   | 9.32 | 9.72 | 10.91 | 9.98 | 8.67 | 9.10 | 10.95 | 9.65 | 7.22 | 7.16 | 6.87 |
| tocopheronolactone                                    | C <sub>46</sub> H <sub>72</sub> O <sub>4</sub>                   | 278.1518 | 5.53     | 4                | [M+H] <sup>+</sup>                           | GL-RP-LC-QTOF-MS    | ESI +          | 3        | 0.94                   | 0.07 | 0.04 | 0.02  | 0.04 | 0.02 | 0.00 | 0.00  | 0.03 | 0.05 | 0.01 | 0.03 |
| tocotrienol                                           | C <sub>28</sub> H <sub>42</sub> O <sub>2</sub>                   | 410.3185 | 4.89     | 4                | [M+H] <sup>+</sup>                           | GL-RP-LC-QTOF-MS    | ESI +          | 3        | 0.34                   | 0.72 | 0.56 | 0.37  | 0.45 | 0.27 | 0.34 | 0.38  | 0.44 | 0.62 | 0.15 | 0.58 |
| Flavoxanthin                                          | C <sub>30</sub> H <sub>36</sub> O <sub>3</sub>                   | 584.4229 | 5.15     | 5                | [M+H-H <sub>2</sub> O] <sup>+</sup>          | GL-RP-LC-QTOF-MS    | ESI +          | 4        | 2.69                   | 2.84 | 3.14 | 2.81  | 3.03 | 2.53 | 3.00 | 2.85  | 2.10 | 1.85 | 1.92 | 2.22 |
| Triterpenoid                                          | C <sub>30</sub> H <sub>48</sub> O <sub>5</sub> S                 | 552.3121 | 2.44     | 8                | [M+H] <sup>+</sup>                           | GL-RP-LC-QTOF-MS    | ESI +          | 4        | 0.04                   | 0.00 | 0.00 | 0.00  | 0.00 | 0.00 | 0.00 | 0.00  | 0.00 | 0.00 | 0.00 | 0.00 |
| Curcumadiol                                           | C <sub>18</sub> H <sub>26</sub> O <sub>2</sub>                   | 238.1933 | 0.7      | 0                | [M+Na] <sup>+</sup>                          | GL-RP-LC-QTOF-MS    | ESI +          | 3        | 0.96                   | 1.46 | 1.09 | 1.42  | 1.30 | 1.18 | 1.69 | 1.76  | 1.13 | 1.11 | 1.12 | 1.24 |
| Cedryl acetate                                        | C <sub>17</sub> H <sub>28</sub> O <sub>2</sub>                   | 264.2089 | 0.71     | 1                | [M+Na] <sup>+</sup>                          | GL-RP-LC-QTOF-MS    | ESI +          | 3        | 0.54                   | 0.61 | 0.47 | 0.58  | 0.58 | 0.44 | 0.69 | 0.69  | 0.37 | 0.34 | 0.37 | 0.42 |
| Armillane                                             | C <sub>23</sub> H <sub>32</sub> O <sub>7</sub>                   | 420.2148 | 2.25     | 6                | [M+H] <sup>+</sup>                           | GL-RP-LC-QTOF-MS    | ESI +          | 3        | 0.04                   | 0.00 | 0.00 | 0.00  | 0.00 | 0.00 | 0.00 | 0.00  | 0.00 | 0.00 | 0.00 | 0.00 |
| <b>Sphingolipids</b>                                  |                                                                  |          |          |                  |                                              |                     |                |          |                        |      |      |       |      |      |      |       |      |      |      |      |
| Termitomycesphin A                                    | C <sub>41</sub> H <sub>77</sub> NO <sub>10</sub>                 | 743.5548 | 9.19     | 6                | [M+H] <sup>+</sup>                           | GL-RP-LC-QTOF-MS    | ESI +          | 3        | 0.36                   | 0.60 | 0.26 | 0.92  | 0.89 | 1.14 | 1.94 | 2.08  | 1.53 | 1.57 | 1.63 | 1.73 |
| CerPE 40:3;O3                                         | C <sub>42</sub> H <sub>81</sub> N <sub>2</sub> O <sub>10</sub> P | 756.5781 | 9.49     | 7                | [M+NH <sub>4</sub> ] <sup>+</sup>            | GL-RP-LC-QTOF-MS    | ESI +          | 3        | 0.79                   | 1.28 | 1.27 | 1.87  | 1.47 | 1.60 | 1.63 | 1.60  | 0.80 | 0.88 | 0.91 | 0.96 |
| CerP 44:1;O2                                          | C <sub>44</sub> H <sub>89</sub> NO <sub>10</sub> P               | 757.6349 | 8.28     | 2                | [M+K] <sup>+</sup>                           | GL-RP-LC-QTOF-MS    | ESI +          | 3        | 0.56                   | 0.77 | 0.66 | 0.80  | 0.91 | 0.89 | 0.74 | 0.74  | 0.71 | 0.66 | 0.69 | 0.74 |
| HexCer 37:0;O4                                        | C <sub>43</sub> H <sub>85</sub> NO <sub>10</sub>                 | 775.6173 | 8.93     | 7                | [M+Na] <sup>+</sup>                          | GL-RP-LC-QTOF-MS    | ESI +          | 3        | 0.70                   | 0.91 | 0.97 | 1.00  | 0.95 | 0.80 | 0.88 | 0.85  | 0.43 | 0.36 | 0.39 | 0.41 |
| HexCer 36:1;O4                                        | C <sub>42</sub> H <sub>81</sub> NO <sub>10</sub>                 | 759.586  | 7.72     | 3                | [M+Na] <sup>+</sup>                          | GL-RP-LC-QTOF-MS    | ESI +          | 3        | 0.19                   | 0.27 | 0.13 | 0.22  | 0.26 | 0.74 | 0.27 | 0.25  | 1.16 | 1.42 | 1.49 | 1.41 |
| HexCer 39:2;O2                                        | C <sub>46</sub> H <sub>88</sub> NO <sub>8</sub>                  | 767.6275 | 10.72    | 1                | [M+HCOOH-H] <sup>-</sup>                     | GL-RP-LC-QTOF-MS    | ESI -          | 3        | 1.08                   | 0.98 | 1.32 | 1.83  | 1.53 | 1.74 | 1.38 | 1.43  | 1.49 | 1.92 | 1.58 | 2.04 |
| HexCer 40:2;O3                                        | C <sub>46</sub> H <sub>87</sub> NO <sub>9</sub>                  | 797.6381 | 11.27    | 1                | [M-H] <sup>-</sup>                           | GL-RP-LC-QTOF-MS    | ESI -          | 3        | 0.53                   | 0.45 | 0.76 | 0.86  | 0.69 | 0.80 | 0.60 | 0.60  | 0.64 | 0.76 | 0.75 | 0.77 |
| N,N-dimethyl-Safingol                                 | C <sub>29</sub> H <sub>43</sub> NO <sub>2</sub>                  | 329.3294 | 6.05     | 5                | [M+H-H <sub>2</sub> O] <sup>+</sup>          | GL-RP-LC-QTOF-MS    | ESI +          | 3        | 0.28                   | 0.00 | 0.00 | 0.00  | 0.00 | 0.00 | 0.00 | 0.00  | 0.00 | 0.00 | 0.00 | 0.00 |
| SPB 17:0;O2                                           | C <sub>17</sub> H <sub>27</sub> NO <sub>2</sub>                  | 287.2824 | 4.49     | 4                | [M+H-H <sub>2</sub> O] <sup>+</sup>          | GL-RP-LC-QTOF-MS    | ESI +          | 3        | 0.03                   | 0.00 | 0.00 | 0.00  | 0.00 | 0.00 | 0.00 | 0.00  | 0.00 | 0.00 | 0.00 | 0.00 |
| Cer 40:0;O3                                           | C <sub>40</sub> H <sub>81</sub> NO <sub>4</sub>                  | 639.6166 | 10.36    | 2                | [M+HCOOH-H] <sup>-</sup>                     | GL-RP-LC-QTOF-MS    | ESI -          | 3        | 0.27                   | 0.27 | 0.46 | 0.65  | 0.40 | 0.61 | 0.51 | 0.51  | 0.55 | 0.68 | 0.59 | 0.74 |
| Cer 40:0;O4                                           | C <sub>40</sub> H <sub>81</sub> NO <sub>5</sub>                  | 655.6115 | 10.58    | 3                | [M-H] <sup>-</sup>                           | GL-RP-LC-QTOF-MS    | ESI -          | 3        | 0.76                   | 0.74 | 1.18 | 1.36  | 1.04 | 1.22 | 0.89 | 0.90  | 1.16 | 1.26 | 1.28 | 1.30 |
| Cer 41:0;O4                                           | C <sub>41</sub> H <sub>83</sub> NO <sub>5</sub>                  | 669.6271 | 11.48    | 1                | [M-H] <sup>-</sup>                           | GL-RP-LC-QTOF-MS    | ESI -          | 3        | 0.65                   | 0.50 | 0.73 | 0.67  | 0.79 | 0.53 | 0.36 | 0.34  | 0.48 | 0.47 | 0.49 | 0.46 |
| Cer 44:0;O4                                           | C <sub>44</sub> H <sub>89</sub> NO <sub>5</sub>                  | 711.6741 | 11.89    | 2                | [M-H] <sup>-</sup>                           | GL-RP-LC-QTOF-MS    | ESI -          | 3        | 0.45                   | 0.37 | 0.65 | 0.72  | 0.58 | 0.61 | 0.56 | 0.47  | 0.56 | 0.64 | 0.70 | 0.69 |
| Cer 44:0;O3                                           | C <sub>44</sub> H <sub>89</sub> NO <sub>4</sub>                  | 695.6792 | 11.7     | 2                | [M+HCOOH-H] <sup>-</sup>                     | GL-RP-LC-QTOF-MS    | ESI -          | 3        | 0.33                   | 0.30 | 0.37 | 0.54  | 0.46 | 0.46 | 0.47 | 0.50  | 0.55 | 0.69 | 0.54 | 0.72 |
| CerPE 38:3;O3                                         | C <sub>40</sub> H <sub>77</sub> N <sub>2</sub> O <sub>10</sub> P | 728.5468 | 8.55     | 3                | [M+HCOOH-H] <sup>-</sup>                     | GL-RP-LC-QTOF-MS    | ESI -          | 3        | 0.52                   | 0.70 | 0.65 | 0.65  | 0.82 | 0.45 | 0.54 | 0.63  | 0.11 | 0.02 | 0.03 | 0.02 |
| <b>Steroids and steroid derivatives</b>               |                                                                  |          |          |                  |                                              |                     |                |          |                        |      |      |       |      |      |      |       |      |      |      |      |
| Benzoyloxystigmast-5-ene-3-ol                         | C <sub>36</sub> H <sub>54</sub> O <sub>3</sub>                   | 534.4073 | 9.05     | 10               | [M+NH <sub>4</sub> ] <sup>+</sup>            | GL-RP-LC-QTOF-MS    | ESI +          | 3        | 2.08                   | 1.67 | 3.07 | 1.52  | 1.77 | 0.92 | 1.12 | 1.01  | 0.84 | 0.51 | 0.61 | 0.53 |

continued on next page

## Supplementary Data 3. (Continued)

| Compound                             | Formula                                                         | Mass     | RT (min) | Mass Error (ppm) | Adduct                              | Analytical platform | Detection Mode | ID level | Relative Abundance (%) |      |      |      |      |      |      |      |      |      |      |      |  |
|--------------------------------------|-----------------------------------------------------------------|----------|----------|------------------|-------------------------------------|---------------------|----------------|----------|------------------------|------|------|------|------|------|------|------|------|------|------|------|--|
|                                      |                                                                 |          |          |                  |                                     |                     |                |          | SC1                    | SC2  | SC3  | SC4  | SC5  | SC6  | SC7  | SC8  | SC9  | SC10 | SC11 | SC12 |  |
| Dehydrotestosterone                  | C <sub>28</sub> H <sub>46</sub> O <sub>4</sub>                  | 446.3396 | 5.45     | 4                | [M+H-H <sub>2</sub> O] <sup>+</sup> | GL-RP-LC-QTOF-MS    | ESI +          | 3        | 0.48                   | 0.52 | 0.56 | 0.40 | 0.49 | 0.34 | 0.25 | 0.38 | 0.49 | 0.47 | 0.28 | 0.53 |  |
| Torvonin A                           | C <sub>39</sub> H <sub>64</sub> O <sub>12</sub>                 | 724.4398 | 4.02     | 9                | [M-H-H <sub>2</sub> O] <sup>-</sup> | GL-RP-LC-QTOF-MS    | ESI -          | 4        | 1.04                   | 0.04 | 0.29 | 0.03 | 0.50 | 0.16 | 0.18 | 0.05 | 0.14 | 0.05 | 0.02 | 0.32 |  |
| <b>Sterol Lipids</b>                 |                                                                 |          |          |                  |                                     |                     |                |          |                        |      |      |      |      |      |      |      |      |      |      |      |  |
| ST 29:2:O2                           | C <sub>29</sub> H <sub>48</sub> O <sub>2</sub>                  | 428.3654 | 7.46     | 5                | [M+H] <sup>+</sup>                  | GL-RP-LC-QTOF-MS    | ESI +          | 3        | 0.46                   | 0.68 | 0.85 | 0.85 | 0.43 | 0.42 | 0.22 | 0.49 | 1.08 | 0.58 | 0.34 | 0.69 |  |
| <b>Tetrapyrroles and derivatives</b> |                                                                 |          |          |                  |                                     |                     |                |          |                        |      |      |      |      |      |      |      |      |      |      |      |  |
| Chlorophyll b                        | C <sub>55</sub> H <sub>71</sub> MgN <sub>3</sub> O <sub>6</sub> | 907.5219 | 9.25     | 4                | [M+H] <sup>+</sup>                  | GL-RP-LC-QTOF-MS    | ESI +          | 3        | 0.47                   | 0.85 | 1.27 | 0.19 | 0.24 | 0.17 | 0.13 | 0.04 | 0.04 | 0.03 | 0.04 | 0.02 |  |
| Unknown                              |                                                                 |          | 0.69     |                  |                                     | GL-RP-LC-QTOF-MS    | ESI +          |          | 1.54                   | 2.03 | 1.62 | 1.89 | 1.75 | 1.84 | 2.44 | 2.57 | 1.64 | 1.76 | 1.78 | 1.95 |  |
| Unknown                              |                                                                 |          | 10.42    |                  |                                     | GL-RP-LC-QTOF-MS    | ESI +          |          | 0.99                   | 0.96 | 1.37 | 0.84 | 0.96 | 0.57 | 0.55 | 1.08 | 0.90 | 0.65 | 0.41 | 0.74 |  |
| Unknown                              |                                                                 |          | 0.65     |                  |                                     | GL-RP-LC-QTOF-MS    | ESI +          |          | 0.62                   | 0.65 | 0.61 | 0.62 | 0.57 | 0.55 | 0.66 | 0.69 | 0.44 | 0.45 | 0.48 | 0.61 |  |
| Unknown                              |                                                                 |          | 0.72     |                  |                                     | GL-RP-LC-QTOF-MS    | ESI +          |          | 0.60                   | 0.63 | 0.58 | 0.57 | 0.59 | 0.47 | 0.64 | 0.65 | 0.39 | 0.37 | 0.39 | 0.50 |  |
| Unknown                              |                                                                 |          | 9.36     |                  |                                     | GL-RP-LC-QTOF-MS    | ESI +          |          | 0.68                   | 0.78 | 0.96 | 0.59 | 0.82 | 0.42 | 0.56 | 0.61 | 0.55 | 0.30 | 0.38 | 0.38 |  |
| Unknown                              |                                                                 |          | 11.16    |                  |                                     | GL-RP-LC-QTOF-MS    | ESI +          |          | 0.56                   | 0.57 | 0.70 | 0.37 | 0.53 | 0.25 | 0.34 | 0.32 | 0.31 | 0.17 | 0.19 | 0.17 |  |
| Unknown                              |                                                                 |          | 5.53     |                  |                                     | GL-RP-LC-QTOF-MS    | ESI +          |          | 1.79                   | 0.16 | 0.14 | 0.05 | 0.13 | 0.05 | 0.00 | 0.00 | 0.11 | 0.11 | 0.06 | 0.05 |  |
| Unknown                              |                                                                 |          | 1.26     |                  |                                     | GL-RP-LC-QTOF-MS    | ESI +          |          | 1.22                   | 0.12 | 0.09 | 0.11 | 0.03 | 0.34 | 0.04 | 0.01 | 0.09 | 0.02 | 0.00 | 0.04 |  |
| Unknown                              |                                                                 |          | 2.55     |                  |                                     | GL-RP-LC-QTOF-MS    | ESI +          |          | 0.58                   | 0.07 | 0.05 | 0.05 | 0.04 | 0.13 | 0.02 | 0.01 | 0.04 | 0.01 | 0.03 | 0.02 |  |
| Unknown                              |                                                                 |          | 1.19     |                  |                                     | GL-RP-LC-QTOF-MS    | ESI +          |          | 0.58                   | 0.10 | 0.04 | 0.06 | 0.07 | 0.13 | 0.02 | 0.01 | 0.04 | 0.01 | 0.01 | 0.02 |  |
| Unknown                              |                                                                 |          | 1.93     |                  |                                     | GL-RP-LC-QTOF-MS    | ESI +          |          | 0.57                   | 0.06 | 0.04 | 0.05 | 0.01 | 0.13 | 0.02 | 0.00 | 0.04 | 0.01 | 0.00 | 0.02 |  |
| Unknown                              |                                                                 |          | 1.8      |                  |                                     | GL-RP-LC-QTOF-MS    | ESI +          |          | 0.59                   | 0.07 | 0.02 | 0.03 | 0.04 | 0.08 | 0.01 | 0.00 | 0.02 | 0.01 | 0.00 | 0.01 |  |
| Unknown                              |                                                                 |          | 5.53     |                  |                                     | GL-RP-LC-QTOF-MS    | ESI +          |          | 0.57                   | 0.00 | 0.00 | 0.00 | 0.00 | 0.00 | 0.00 | 0.00 | 0.00 | 0.00 | 0.00 | 0.00 |  |
| Unknown                              |                                                                 |          | 8.97     |                  |                                     | GL-RP-LC-QTOF-MS    | ESI +          |          | 0.18                   | 0.63 | 0.19 | 0.81 | 0.65 | 0.81 | 0.90 | 0.88 | 0.73 | 0.78 | 0.78 | 0.89 |  |
| Unknown                              |                                                                 |          | 1.46     |                  |                                     | GL-RP-LC-QTOF-MS    | ESI +          |          | 0.33                   | 0.32 | 0.15 | 0.62 | 0.42 | 0.23 | 0.21 | 1.81 | 0.10 | 0.58 | 2.13 | 1.20 |  |
| Unknown                              |                                                                 |          | 7.91     |                  |                                     | GL-RP-LC-QTOF-MS    | ESI +          |          | 0.12                   | 0.18 | 0.16 | 0.18 | 0.19 | 0.58 | 0.18 | 0.16 | 0.79 | 0.88 | 0.98 | 0.91 |  |
| Unknown                              |                                                                 |          | 0.78     |                  |                                     | GL-RP-LC-QTOF-MS    | ESI +          |          | 0.07                   | 0.00 | 0.05 | 0.04 | 0.00 | 0.00 | 0.14 | 0.00 | 2.69 | 2.39 | 1.74 | 0.23 |  |
| Unknown                              |                                                                 |          | 0.78     |                  |                                     | GL-RP-LC-QTOF-MS    | ESI +          |          | 0.07                   | 0.00 | 0.05 | 0.04 | 0.00 | 0.00 | 0.14 | 0.00 | 2.79 | 2.47 | 1.77 | 0.22 |  |
| Unknown                              |                                                                 |          | 0.79     |                  |                                     | GL-RP-LC-QTOF-MS    | ESI +          |          | 0.04                   | 0.00 | 0.03 | 0.03 | 0.00 | 0.00 | 0.07 | 0.00 | 1.61 | 1.43 | 0.99 | 0.12 |  |
| Unknown                              |                                                                 |          | 0.78     |                  |                                     | GL-RP-LC-QTOF-MS    | ESI +          |          | 0.00                   | 0.00 | 0.00 | 0.00 | 0.00 | 0.00 | 0.00 | 0.00 | 1.41 | 1.23 | 0.87 | 0.10 |  |
| Unknown                              |                                                                 |          | 0.79     |                  |                                     | GL-RP-LC-QTOF-MS    | ESI +          |          | 0.00                   | 0.00 | 0.00 | 0.00 | 0.00 | 0.00 | 0.03 | 0.00 | 0.59 | 0.52 | 0.34 | 0.04 |  |
| Unknown                              |                                                                 |          | 0.85     |                  |                                     | GL-RP-LC-QTOF-MS    | ESI +          |          | 0.02                   | 0.01 | 0.01 | 0.01 | 0.01 | 0.01 | 0.00 | 0.00 | 0.01 | 1.10 | 0.03 | 0.25 |  |
| Unknown                              |                                                                 |          | 8.92     |                  |                                     | GL-RP-LC-QTOF-MS    | ESI +          |          | 0.44                   | 0.52 | 0.54 | 0.54 | 0.54 | 0.44 | 0.49 | 0.49 | 0.27 | 0.23 | 0.25 | 0.27 |  |
| Unknown                              |                                                                 |          | 8.46     |                  |                                     | GL-RP-LC-QTOF-MS    | ESI +          |          | 0.29                   | 0.11 | 0.53 | 0.22 | 0.36 | 0.14 | 0.19 | 0.23 | 0.08 | 0.08 | 0.08 | 0.04 |  |
| Unknown                              |                                                                 |          | 5.83     |                  |                                     | GL-RP-LC-QTOF-MS    | ESI +          |          | 0.29                   | 0.39 | 0.46 | 0.72 | 0.66 | 0.40 | 0.57 | 0.42 | 0.26 | 0.17 | 0.07 | 0.21 |  |
| Unknown                              |                                                                 |          | 5.83     |                  |                                     | GL-RP-LC-QTOF-MS    | ESI +          |          | 0.29                   | 0.39 | 0.46 | 0.71 | 0.66 | 0.40 | 0.57 | 0.42 | 0.26 | 0.17 | 0.07 | 0.21 |  |
| Unknown                              |                                                                 |          | 10.86    |                  |                                     | GL-RP-LC-QTOF-MS    | ESI +          |          | 0.29                   | 0.23 | 0.38 | 0.57 | 0.46 | 0.52 | 0.40 | 0.36 | 0.27 | 0.37 | 0.28 | 0.49 |  |
| Unknown                              |                                                                 |          | 0.89     |                  |                                     | GL-RP-LC-QTOF-MS    | ESI +          |          | 0.03                   | 0.00 | 0.00 | 0.00 | 0.00 | 0.00 | 0.00 | 0.00 | 0.00 | 0.00 | 0.00 | 0.00 |  |
| Unknown                              |                                                                 |          | 3.56     |                  |                                     | GL-RP-LC-QTOF-MS    | ESI +          |          | 0.03                   | 0.00 | 0.00 | 0.00 | 0.00 | 0.00 | 0.00 | 0.00 | 0.00 | 0.00 | 0.00 | 0.00 |  |
| Unknown                              |                                                                 |          | 0.9      |                  |                                     | GL-RP-LC-QTOF-MS    | ESI +          |          | 0.02                   | 0.00 | 0.00 | 0.00 | 0.00 | 0.00 | 0.00 | 0.00 | 0.00 | 0.00 | 0.00 | 0.00 |  |
| Unknown                              |                                                                 |          | 1.93     |                  |                                     | GL-RP-LC-QTOF-MS    | ESI +          |          | 0.02                   | 0.00 | 0.00 | 0.00 | 0.00 | 0.00 | 0.00 | 0.00 | 0.00 | 0.00 | 0.00 | 0.00 |  |
| Unknown                              |                                                                 |          | 11.94    |                  |                                     | GL-RP-LC-QTOF-MS    | ESI +          |          | 0.02                   | 0.00 | 0.00 | 0.00 | 0.00 | 0.00 | 0.00 | 0.00 | 0.00 | 0.00 | 0.00 | 0.00 |  |
| Unknown                              |                                                                 |          | 3.59     |                  |                                     | GL-RP-LC-QTOF-MS    | ESI +          |          | 0.02                   | 0.00 | 0.00 | 0.00 | 0.00 | 0.00 | 0.00 | 0.00 | 0.00 | 0.00 | 0.00 | 0.00 |  |
| Unknown                              |                                                                 |          | 4.29     |                  |                                     | GL-RP-LC-QTOF-MS    | ESI +          |          | 0.02                   | 0.00 | 0.00 | 0.00 | 0.00 | 0.00 | 0.00 | 0.00 | 0.00 | 0.00 | 0.00 | 0.00 |  |
| Unknown                              |                                                                 |          | 1.02     |                  |                                     | GL-RP-LC-QTOF-MS    | ESI +          |          | 0.02                   | 0.00 | 0.00 | 0.00 | 0.00 | 0.00 | 0.00 | 0.00 | 0.00 | 0.00 | 0.00 | 0.00 |  |
| Unknown                              |                                                                 |          | 2.67     |                  |                                     | GL-RP-LC-QTOF-MS    | ESI +          |          | 0.01                   | 0.00 | 0.00 | 0.00 | 0.00 | 0.00 | 0.00 | 0.00 | 0.00 | 0.00 | 0.00 | 0.00 |  |
| Unknown                              |                                                                 |          | 2.8      |                  |                                     | GL-RP-LC-QTOF-MS    | ESI -          |          | 1.83                   | 0.43 | 0.12 | 0.18 | 0.22 | 0.48 | 0.09 | 0.04 | 0.21 | 0.06 | 0.10 | 0.12 |  |
| Unknown                              |                                                                 |          | 4.91     |                  |                                     | GL-RP-LC-QTOF-MS    | ESI -          |          | 0.87                   | 0.03 | 0.23 | 0.02 | 0.30 | 0.10 | 0.10 | 0.02 | 0.08 | 0.02 | 0.01 | 0.14 |  |
| Unknown                              |                                                                 |          | 1.46     |                  |                                     | GL-RP-LC-QTOF-MS    | ESI -          |          | 0.67                   | 0.09 | 0.05 | 0.06 | 0.10 | 0.15 | 0.02 | 0.03 | 0.05 | 0.04 | 0.06 | 0.03 |  |
| Unknown                              |                                                                 |          | 1.46     |                  |                                     | GL-RP-LC-QTOF-MS    | ESI -          |          | 0.73                   | 0.09 | 0.03 | 0.06 | 0.12 | 0.18 | 0.02 | 0.01 | 0.07 | 0.01 | 0.03 | 0.03 |  |
| Unknown                              |                                                                 |          | 0.82     |                  |                                     | GL-RP-LC-QTOF-MS    | ESI -          |          | 0.12                   | 0.70 | 0.16 | 0.01 | 0.03 | 0.01 | 0.00 | 0.03 | 0.04 | 1.72 | 0.13 | 0.75 |  |
| Unknown                              |                                                                 |          | 0.82     |                  |                                     | GL-RP-LC-QTOF-MS    | ESI -          |          | 0.09                   | 0.47 | 0.11 | 0.01 | 0.02 | 0.01 | 0.00 | 0.02 | 0.02 | 1.21 | 0.08 | 0.51 |  |

continued on next page

**Supplementary Data 3.** (Continued)

| Compound | Formula | Mass | RT (min) | Mass Error (ppm) | Adduct | Analytical platform | Detection Mode | ID level | Relative Abundance (%) |      |      |      |      |      |      |      |      |      |      |      |
|----------|---------|------|----------|------------------|--------|---------------------|----------------|----------|------------------------|------|------|------|------|------|------|------|------|------|------|------|
|          |         |      |          |                  |        |                     |                |          | SC1                    | SC2  | SC3  | SC4  | SC5  | SC6  | SC7  | SC8  | SC9  | SC10 | SC11 | SC12 |
| Unknown  |         |      | 0.82     |                  |        | GL-RP-LC-QTOF-MS    | ESI -          |          | 0.07                   | 0.29 | 0.09 | 0.00 | 0.01 | 0.00 | 0.00 | 0.01 | 0.02 | 0.52 | 0.06 | 0.27 |
| Unknown  |         |      | 8.13     |                  |        | GL-RP-LC-QTOF-MS    | ESI -          |          | 0.31                   | 0.44 | 0.48 | 0.50 | 0.49 | 0.51 | 0.45 | 0.49 | 0.54 | 0.48 | 0.55 | 0.48 |
| Unknown  |         |      | 9.09     |                  |        | GL-RP-LC-QTOF-MS    | ESI -          |          | 0.13                   | 0.58 | 0.85 | 0.05 | 0.07 | 0.06 | 0.06 | 0.00 | 0.00 | 0.00 | 0.00 | 0.00 |
| Unknown  |         |      | 9.42     |                  |        | GL-RP-LC-QTOF-MS    | ESI -          |          | 0.47                   | 0.64 | 0.40 | 0.20 | 0.21 | 0.21 | 0.18 | 0.21 | 0.28 | 0.15 | 0.11 | 0.09 |
| Unknown  |         |      | 9.42     |                  |        | GL-RP-LC-QTOF-MS    | ESI -          |          | 0.38                   | 0.52 | 0.34 | 0.13 | 0.15 | 0.15 | 0.12 | 0.13 | 0.16 | 0.09 | 0.07 | 0.06 |
| Unknown  |         |      | 10.84    |                  |        | GL-RP-LC-QTOF-MS    | ESI -          |          | 0.48                   | 0.24 | 0.51 | 0.26 | 0.34 | 0.23 | 0.16 | 0.14 | 0.14 | 0.09 | 0.30 | 0.12 |
| Unknown  |         |      | 8.69     |                  |        | GL-RP-LC-QTOF-MS    | ESI -          |          | 0.10                   | 0.25 | 0.13 | 0.41 | 0.38 | 0.35 | 1.02 | 0.92 | 0.15 | 0.09 | 0.12 | 0.12 |
| Unknown  |         |      | 8.14     |                  |        | GL-RP-LC-QTOF-MS    | ESI -          |          | 0.07                   | 0.19 | 0.10 | 0.29 | 0.26 | 0.20 | 0.77 | 0.73 | 0.10 | 0.05 | 0.06 | 0.06 |

GL: global lipidomics, LC: liquid chromatography, QTOF-MS: quadrupole time-of-flight mass spectrometer.
