# Supplementary material for: Predicting the microalgae lipid profile obtained by supercritical fluid extraction using a machine learning model
Source: PubMed Central journal article supplement (PMC11543471; doi:10.3389/fchem.2024.1480887), 2024-10-25
Supplement: DataSheet4.pdf [file DataSheet4.pdf]

## Supplementary Data 4

Representative lipids selected using an unsupervised learning method

| Compound                                         | Molecular Formula                               | Molecular weight (DB) g/mol | Isomers | ID Level | Lipid selected                                               |
|--------------------------------------------------|-------------------------------------------------|-----------------------------|---------|----------|--------------------------------------------------------------|
| <i>Carbohydrates and carbohydrate conjugates</i> |                                                 |                             |         |          |                                                              |
| Armillarin                                       | C <sub>24</sub> H <sub>30</sub> O <sub>6</sub>  | 414.2042                    | 1       | MS/MS    | Armillarin                                                   |
| <i>Fatty Acyls</i>                               |                                                 |                             |         |          |                                                              |
| aminopentanoic acid                              | C <sub>5</sub> H <sub>11</sub> NO <sub>2</sub>  | 117.079                     | 6       | Putative | 4-amino-pentanoic acid                                       |
| FAL 16:0                                         | C <sub>16</sub> H <sub>32</sub> O               | 240.2453                    | 1       | MS/MS    | Palmitaldehyde                                               |
| FA 22:5;O                                        | C <sub>22</sub> H <sub>34</sub> O <sub>3</sub>  | 346.2508                    | 1       | MS/MS    | Leiopathic acid                                              |
| FA 22:6;O                                        | C <sub>22</sub> H <sub>32</sub> O <sub>3</sub>  | 344.2351                    | 1       | MS/MS    | 13-HDoHE                                                     |
| FA 22:4;O                                        | C <sub>22</sub> H <sub>36</sub> O <sub>3</sub>  | 348.2664                    | 1       | MS/MS    | 12,15-epoxy-13,14-dimethyleicosa-12,14,16-trienoic acid      |
| FA 26:1;O2                                       | C <sub>26</sub> H <sub>50</sub> O <sub>4</sub>  | 426.3709                    | 1       | MS/MS    | Hexacosanedioic acid                                         |
| FOH 5:1                                          | C <sub>5</sub> H <sub>10</sub> O                | 86.0732                     | 5       | Putative | 3-Methyl-2-buten-1-ol                                        |
| Stearamide                                       | C <sub>18</sub> H <sub>37</sub> NO              | 283.2875                    | 1       | MS/MS    | Stearamide                                                   |
| NA 23:4                                          | C <sub>23</sub> H <sub>39</sub> NO              | 345.3032                    | 8       | Putative | N-(2-methyl-2S-hydroxy-ethyl) arachidonoyl amine             |
| NA 25:4                                          | C <sub>25</sub> H <sub>43</sub> NO              | 373.3345                    | 13      | Putative | N-(2S-hydroxy-propyl) alpha,alpha-dimethylarachidonoyl amine |
| 6E-Heneicosen-11-one                             | C <sub>21</sub> H <sub>40</sub> O               | 308.3079                    | 1       | MS/MS    | 6E-Heneicosen-11-one                                         |
| 12-Nonadecen-9-one                               | C <sub>19</sub> H <sub>36</sub> O               | 280.2766                    | 1       | MS/MS    | 12Z-Nonadecen-9-one                                          |
| WE 24:2;O4                                       | C <sub>24</sub> H <sub>44</sub> O <sub>6</sub>  | 428.3138                    | 1       | MS/MS    | Glyceryl lactooleate                                         |
| <i>Glycerolipids</i>                             |                                                 |                             |         |          |                                                              |
| MGDG 16:0_18:1                                   | C <sub>43</sub> H <sub>80</sub> O <sub>10</sub> | 756.5752                    | 1       | MS/MS    | MGDG(16:0/18:1(9Z))                                          |
| MGDG 16:0_18:2                                   | C <sub>43</sub> H <sub>78</sub> O <sub>10</sub> | 754.5595                    | 1       | MS/MS    | MGDG(16:0/18:2(9Z,12Z))                                      |
| MGDG 18:2_18:2                                   | C <sub>45</sub> H <sub>78</sub> O <sub>10</sub> | 778.5595                    | 1       | MS/MS    | MGDG(18:2(9Z,12Z)/18:2(9Z,12Z))                              |
| MGDG 18:1_18:1                                   | C <sub>45</sub> H <sub>82</sub> O <sub>10</sub> | 782.5908                    | 1       | MS/MS    | MGDG(18:1(9Z)/18:1(9Z))                                      |
| MGDG 36:6                                        | C <sub>45</sub> H <sub>74</sub> O <sub>10</sub> | 774.5282                    | 1       | MS/MS    | MGDG(18:3(9Z,12Z,15Z)/18:3(9Z,12Z,15Z))                      |

*continued on next page*

## Supplementary Data 4. (Continued)

| Compound                                                                                                            | Molecular Formula                                 | Molecular weight (DB) g/mol | Isomers | ID Level | Lipid selected                                                                                                      |
|---------------------------------------------------------------------------------------------------------------------|---------------------------------------------------|-----------------------------|---------|----------|---------------------------------------------------------------------------------------------------------------------|
| DG 34:1                                                                                                             | C <sub>37</sub> H <sub>70</sub> O <sub>5</sub>    | 594.5223                    | 10      | Putative | DG(17:0/17:1(9Z)/0:0)[iso2]                                                                                         |
| DG 36:2                                                                                                             | C <sub>39</sub> H <sub>72</sub> O <sub>5</sub>    | 620.538                     | 8       | Putative | DG(16:1(9Z)/20:1(11Z)/0:0)[iso2]                                                                                    |
| DG O-40:8                                                                                                           | C <sub>43</sub> H <sub>70</sub> O <sub>4</sub>    | 650.5274                    | 4       | Putative | 1-(8-[3]-ladderane-octanoyl)-2-(8-[1]-ladderane-octanoyl)-sn-glycerol                                               |
| DG 42:6                                                                                                             | C <sub>45</sub> H <sub>76</sub> O <sub>5</sub>    | 696.5693                    | 6       | Putative | DG(20:1(11Z)/22:5(7Z,10Z,13Z,16Z,19Z)/0:0)[iso2]                                                                    |
| SQDG 16:0_16:0                                                                                                      | C <sub>41</sub> H <sub>78</sub> O <sub>12</sub> S | 794.5214                    | 1       | MS/MS    | SQDG(16:0/16:0)                                                                                                     |
| Glycerol-2-(9Z,12Z-octadecadienoate)-1-hexadecanoate-3-O-[alpha-D-galactopyranosyl-(1->6)-beta-D-galactopyranoside] | C <sub>49</sub> H <sub>88</sub> O <sub>15</sub>   | 916.6123                    | 1       | MS/MS    | Glycerol-2-(9Z,12Z-octadecadienoate)-1-hexadecanoate-3-O-[alpha-D-galactopyranosyl-(1->6)-beta-D-galactopyranoside] |
| <b>Glycerophospholipids</b>                                                                                         |                                                   |                             |         |          |                                                                                                                     |
| PG 34:1                                                                                                             | C <sub>40</sub> H <sub>77</sub> O <sub>10</sub> P | 748.5254                    | 17      | Putative | PG(19:1(9Z)/15:0)                                                                                                   |
| PG O-36:1                                                                                                           | C <sub>42</sub> H <sub>83</sub> O <sub>9</sub> P  | 762.5775                    | 6       | Putative | PG(O-16:0/20:1(11Z))                                                                                                |
| PG 40:1                                                                                                             | C <sub>46</sub> H <sub>89</sub> O <sub>10</sub> P | 832.6193                    | 8       | Putative | PG(18:1(9Z)/22:0)                                                                                                   |
| PG O-38:3                                                                                                           | C <sub>44</sub> H <sub>83</sub> O <sub>9</sub> P  | 786.5775                    | 6       | Putative | PG(O-20:0/18:3(6Z,9Z,12Z))                                                                                          |
| PG 40:6                                                                                                             | C <sub>46</sub> H <sub>79</sub> O <sub>10</sub> P | 822.5411                    | 11      | Putative | PG(20:4(5Z,8Z,11Z,14Z)/20:2(11Z,14Z))                                                                               |
| LPC O-14:0                                                                                                          | C <sub>22</sub> H <sub>48</sub> NO <sub>6</sub> P | 453.3219                    | 1       | MS/MS    | PC(O-14:0/0:0)                                                                                                      |
| PC O-34:5                                                                                                           | C <sub>42</sub> H <sub>76</sub> NO <sub>7</sub> P | 737.5359                    | 1       | MS/MS    | PC(P-16:0/18:4(6Z,9Z,12Z,15Z))                                                                                      |
| PC 36:1                                                                                                             | C <sub>44</sub> H <sub>86</sub> NO <sub>8</sub> P | 787.6091                    | 26      | Putative | PC(16:0/20:1(11Z))                                                                                                  |
| PC O-38:9                                                                                                           | C <sub>46</sub> H <sub>76</sub> NO <sub>7</sub> P | 785.5359                    | 1       | MS/MS    | 1-(6-[5]-ladderane-hexanoyl)-2-(8-[3]-ladderane-octanoyl)-sn-glycerophosphocholine                                  |
| PC 16:1_16:0                                                                                                        | C <sub>40</sub> H <sub>78</sub> NO <sub>8</sub> P | 731.5465                    | 2       | Putative | PC(16:0/16:1(9Z))                                                                                                   |
| PC 16:0_18:1                                                                                                        | C <sub>42</sub> H <sub>82</sub> NO <sub>8</sub> P | 759.5778                    | 8       | Putative | PC(16:0/18:1(11E))                                                                                                  |

*continued on next page*

**Supplementary Data 4.** (Continued)

| Compound     | Molecular Formula                                              | Molecular weight (DB) g/mol | Isomers | ID Level | Lipid selected                                            |
|--------------|----------------------------------------------------------------|-----------------------------|---------|----------|-----------------------------------------------------------|
| PC 18:1_18:1 | C <sub>44</sub> H <sub>84</sub> NO <sub>8</sub> P              | 785.5935                    | 21      | Putative | PC(18:1(15Z)/18:1(15Z))                                   |
| PC 18:2_16:0 | C <sub>42</sub> H <sub>80</sub> NO <sub>8</sub> P              | 757.5622                    | 12      | Putative | PC(16:0/18:2(11Z,13Z))                                    |
| PC 18:2_18:2 | C <sub>44</sub> H <sub>80</sub> NO <sub>8</sub> P              | 781.5622                    | 5       | Putative | PC(18:2(6Z,9Z)/18:2(6Z,9Z))                               |
| LPE O-24:0;O | C <sub>29</sub> H <sub>62</sub> NO <sub>7</sub> P              | 567.4264                    | 1       | MS/MS    | 1-(2-methoxy-tricosanyl)-sn-glycero-3-phosphoethanolamine |
| PE 36:1      | C <sub>41</sub> H <sub>80</sub> NO <sub>8</sub> P              | 745.5622                    | 17      | Putative | PE(16:1(9Z)/20:0)                                         |
| PE 37:3      | C <sub>42</sub> H <sub>78</sub> NO <sub>8</sub> P              | 755.5465                    | 14      | Putative | PE(17:2(9Z,12Z)/20:1(11Z))                                |
| PE 38:2      | C <sub>43</sub> H <sub>82</sub> NO <sub>8</sub> P              | 771.5778                    | 14      | Putative | PE(20:0/18:2(9Z,12Z))                                     |
| PE 39:3      | C <sub>44</sub> H <sub>82</sub> NO <sub>8</sub> P              | 783.5778                    | 12      | Putative | PE(19:0/20:3(8Z,11Z,14Z))                                 |
| PE 18:1_18:1 | C <sub>41</sub> H <sub>78</sub> NO <sub>8</sub> P              | 743.5465                    | 3       | Putative | PE(18:1(9E)/18:1(9E))                                     |
| PE 18:2_18:1 | C <sub>41</sub> H <sub>76</sub> NO <sub>8</sub> P              | 741.5309                    | 2       | Putative | PE(18:1(9Z)/18:2(9Z,12Z))                                 |
| PA O-36:0    | C <sub>39</sub> H <sub>79</sub> O <sub>7</sub> P               | 690.5563                    | 3       | Putative | PA(O-16:0/20:0)                                           |
| PE dO-40:0   | C <sub>45</sub> H <sub>94</sub> NO <sub>7</sub> P              | 791.6768                    | 1       | MS/MS    | beta-hydroarchaetidylethanolamine                         |
| PI O-38:1    | C <sub>47</sub> H <sub>91</sub> O <sub>12</sub> P              | 878.6248                    | 6       | Putative | PI(O-16:0/22:1(11Z))                                      |
| PI 38:4      | C <sub>47</sub> H <sub>83</sub> O <sub>13</sub> P              | 886.5571                    | 13      | Putative | PI(18:3(6Z,9Z,12Z)/20:1(11Z))                             |
| PI 44:8      | C <sub>53</sub> H <sub>87</sub> O <sub>13</sub> P              | 962.5884                    | 3       | Putative | PI(22:4(7Z,10Z,13Z,16Z)/22:4(7Z,10Z,13Z,16Z))             |
| PIP 38:2     | C <sub>47</sub> H <sub>88</sub> O <sub>16</sub> P <sub>2</sub> | 970.5548                    | 2       | Putative | PI(P-18:0/20:2(11Z,14Z))                                  |
| PIM1 32:1    | C <sub>47</sub> H <sub>87</sub> O <sub>18</sub> P              | 970.563                     | 2       | Putative | PIM1(16:0/16:1(9Z))                                       |
| PS 39:2      | C <sub>45</sub> H <sub>84</sub> NO <sub>10</sub> P             | 829.5833                    | 12      | Putative | PS(19:0/20:2(11Z,14Z))                                    |

*continued on next page*

**Supplementary Data 4.** (Continued)

| Compound                                              | Molecular Formula                                               | Molecular weight (DB) g/mol | Isomers | ID Level | Lipid selected                     |
|-------------------------------------------------------|-----------------------------------------------------------------|-----------------------------|---------|----------|------------------------------------|
| PS 39:3                                               | C <sub>45</sub> H <sub>82</sub> NO <sub>10</sub> P              | 827.5676                    | 12      | Putative | PS(22:1(11Z)/17:2(9Z,12Z))         |
| PS 36:0                                               | C <sub>42</sub> H <sub>82</sub> NO <sub>10</sub> P              | 791.5676                    | 8       | Putative | PS(20:0/16:0)                      |
| PS 39:4                                               | C <sub>45</sub> H <sub>80</sub> NO <sub>10</sub> P              | 825.552                     | 10      | Putative | PS(17:0/22:4(7Z,10Z,13Z,16Z))      |
| PS(DiMe(11,3)/DiMe(13,5))                             | C <sub>50</sub> H <sub>84</sub> NO <sub>12</sub> P              | 921.5731                    | 1       | MS/MS    | PS(DiMe(11,3)/DiMe(13,5))          |
| <b>Polyketides</b>                                    |                                                                 |                             |         |          |                                    |
| Anacardic acid                                        | C <sub>22</sub> H <sub>30</sub> O <sub>3</sub>                  | 342.2195                    | 1       | MS/MS    | Anacardic acid                     |
| <b>Prenol lipids</b>                                  |                                                                 |                             |         |          |                                    |
| Lucidenic acid                                        | C <sub>27</sub> H <sub>38</sub> O <sub>7</sub>                  | 474.2618                    | 3       | Putative | Lucidenic acid B                   |
| Hydroxyglabrolide                                     | C <sub>30</sub> H <sub>44</sub> O <sub>5</sub>                  | 484.3189                    | 1       | MS/MS    | 24-Hydroxyglabrolide               |
| Zeaxanthin diglucoside/ Zeaxanthin beta-D-diglucoside | C <sub>52</sub> H <sub>76</sub> O <sub>12</sub>                 | 892.5337                    | 1       | MS/MS    | Zeaxanthin diglucoside             |
| tocopheronolactone                                    | C <sub>16</sub> H <sub>22</sub> O <sub>4</sub>                  | 278.1518                    | 1       | MS/MS    | alpha-tocopheronolactone           |
| tocotrienol                                           | C <sub>28</sub> H <sub>42</sub> O <sub>2</sub>                  | 410.3185                    | 1       | MS/MS    | gamma-tocotrienol                  |
| Flavoxanthin                                          | C <sub>40</sub> H <sub>56</sub> O <sub>3</sub>                  | 584.4229                    | 1       | MS/MS    | Flavoxanthin                       |
| Triterpenoid                                          | C <sub>30</sub> H <sub>48</sub> O <sub>7</sub> S                | 552.3121                    | 1       | MS/MS    | Triterpenoid                       |
| Curcumadiol                                           | C <sub>15</sub> H <sub>26</sub> O <sub>2</sub>                  | 238.1933                    | 1       | MS/MS    | Curcumadiol                        |
| Cedryl acetate                                        | C <sub>17</sub> H <sub>28</sub> O <sub>2</sub>                  | 264.2089                    | 1       | MS/MS    | Cedryl acetate                     |
| Armillane                                             | C <sub>23</sub> H <sub>32</sub> O <sub>7</sub>                  | 420.2148                    | 1       | MS/MS    | Armillane                          |
| <b>Sphingolipids</b>                                  |                                                                 |                             |         |          |                                    |
| Termitomycesphin A                                    | C <sub>41</sub> H <sub>77</sub> NO <sub>10</sub>                | 743.5548                    | 1       | MS/MS    | Termitomycesphin A                 |
| CerPE 40:3;O3                                         | C <sub>42</sub> H <sub>81</sub> N <sub>2</sub> O <sub>7</sub> P | 756.5781                    | 1       | MS/MS    | CerPE(d14:2(4E,6E)/24:1(15Z)(2OH)) |
| CerP 44:1;O2                                          | C <sub>44</sub> H <sub>88</sub> NO <sub>6</sub> P               | 757.6349                    | 1       | MS/MS    | CerP(d18:1/26:0)                   |
| HexCer 37:0;O4                                        | C <sub>43</sub> H <sub>85</sub> NO <sub>10</sub>                | 775.6173                    | 1       | MS/MS    | PI-Cer(d18:0/26:0)                 |
| HexCer 36:1;O4                                        | C <sub>42</sub> H <sub>81</sub> NO <sub>10</sub>                | 759.586                     | 1       | MS/MS    | GlcCer(t18:1(8Z)/18:0(2OH[S]))     |
| HexCer 39:2;O2                                        | C <sub>45</sub> H <sub>85</sub> NO <sub>8</sub>                 | 767.6275                    | 1       | MS/MS    | GalCer(d18:2/21:0)                 |

*continued on next page*

**Supplementary Data 4.** (Continued)

| Compound                                | Molecular Formula                                               | Molecular weight (DB) g/mol | Isomers | ID Level | Lipid selected                                |
|-----------------------------------------|-----------------------------------------------------------------|-----------------------------|---------|----------|-----------------------------------------------|
| HexCer 40:2;O3                          | C <sub>46</sub> H <sub>87</sub> NO <sub>9</sub>                 | 797.6381                    | 1       | MS/MS    | GlcCer(d18:2(4E,8Z)/22:0(2OH[R]))             |
| N,N-dimethyl-Safingol                   | C <sub>20</sub> H <sub>43</sub> NO <sub>2</sub>                 | 329.3294                    | 1       | MS/MS    | N,N-dimethyl-Safingol                         |
| SPB 17:0;O2                             | C <sub>17</sub> H <sub>37</sub> NO <sub>2</sub>                 | 287.2824                    | 1       | MS/MS    | C17 Sphinganine                               |
| Cer 40:0;O3                             | C <sub>40</sub> H <sub>81</sub> NO <sub>4</sub>                 | 639.6166                    | 2       | Putative | Cer(t18:0/22:0)                               |
| Cer 40:0;O4                             | C <sub>40</sub> H <sub>81</sub> NO <sub>5</sub>                 | 655.6115                    | 1       | MS/MS    | Cer(t16:0(15Me)/23:0(2OH[R]))                 |
| Cer 41:0;O4                             | C <sub>41</sub> H <sub>83</sub> NO <sub>5</sub>                 | 669.6271                    | 1       | MS/MS    | Cer(t17:0/24:0(2OH))                          |
| Cer 44:0;O4                             | C <sub>44</sub> H <sub>89</sub> NO <sub>5</sub>                 | 711.6741                    | 1       | MS/MS    | Cer(t18:0/26:0(2OH))                          |
| Cer 44:0;O3                             | C <sub>44</sub> H <sub>89</sub> NO <sub>4</sub>                 | 695.6792                    | 2       | Putative | Cer(d18:0/26:0(2OH))                          |
| CerPE 38:3;O3                           | C <sub>40</sub> H <sub>77</sub> N <sub>2</sub> O <sub>7</sub> P | 728.5468                    | 2       | Putative | CerPE(d14:2(4E,6E)/24:1(15Z)(2OH))            |
| <i>Steroids and steroid derivatives</i> |                                                                 |                             |         |          |                                               |
| Benzoyloxystigmast-5-ene-3-ol           | C <sub>36</sub> H <sub>54</sub> O <sub>3</sub>                  | 534.4073                    | 1       | MS/MS    | (3b,24R,25x)-26-Benzoyloxystigmast-5-ene-3-ol |
| Dehydroteasterone                       | C <sub>28</sub> H <sub>46</sub> O <sub>4</sub>                  | 446.3396                    | 1       | MS/MS    | 3-Dehydroteasterone                           |
| Torvonin A                              | C <sub>39</sub> H <sub>64</sub> O <sub>12</sub>                 | 724.4398                    | 1       | MS/MS    | Torvonin A                                    |
| <i>Sterol Lipids</i>                    |                                                                 |                             |         |          |                                               |
| ST 29:2;O2                              | C <sub>29</sub> H <sub>48</sub> O <sub>2</sub>                  | 428.3654                    | 1       | MS/MS    | Sarcophytosterol                              |
| <i>Tetrapyrroles and derivatives</i>    |                                                                 |                             |         |          |                                               |
| Chlorophyll b                           | C <sub>55</sub> H <sub>71</sub> MgN <sub>4</sub> O <sub>6</sub> | 907.5219                    | 1       | MS/MS    | Chlorophyll b                                 |
